# Supplementary material for: Definition of the Binding Architecture to a Target Promoter of HP1043, the Essential Master Regulator of Helicobacter pylori
Source: MDPI journal article supplement (doi:10.3390/ijms22157848), 2021-07-22
Supplement: s1 [file s1]

## Supplementary Materials

# Definition of the binding architecture of the HP1043 regulatory protein of *Helicobacter pylori* to a target promoter

Annamaria Zannoni <sup>1</sup>, Simone Pellicciari <sup>1</sup>, Francesco Musiani <sup>1</sup>, Federica Chiappori <sup>2</sup>, Davide Roncarati <sup>1,\*</sup> and Vincenzo Scarlato <sup>1,\*</sup>

|                                                                                                   |      |
|---------------------------------------------------------------------------------------------------|------|
| Table of contents                                                                                 | Pag. |
| Figure S1: Methyl green did not interfere with HP1043 binding to <i>P<sub>hp1227</sub></i> target | 2    |
| Figure S2: Molecular dynamics conformations clustering                                            | 2    |
| Figure S3: Calculated distance between selected residues at the HP1043-DNA interface              | 2    |
| Table S1: List of oligonucleotides used in this study                                             | 3    |
| Table S2: List of plasmids used in this study                                                     | 5    |
| Table S3: Binding energy obtained from alanine scanning                                           | 7    |

Figure S1

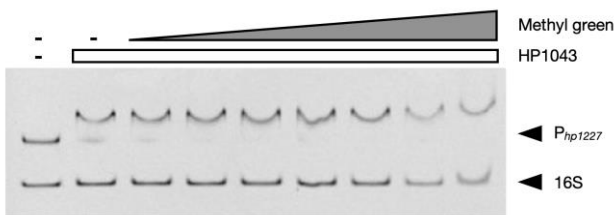

**Figure S1:** Methyl green did not interfere with HP1043 binding to  $P_{hp1227}$  target. EMSA in the presence of a fixed amount of HP1043 (8  $\mu\text{M}$ ) and increasing concentrations of the DNA major groove binder methyl green (0.001, 0.01, 0.1, 1, 10, 100, 500  $\mu\text{M}$ ). A 60 bp probe of the 16S rRNA gene was used as internal specificity control. Symbols are as in Figure 3.

Figure S2

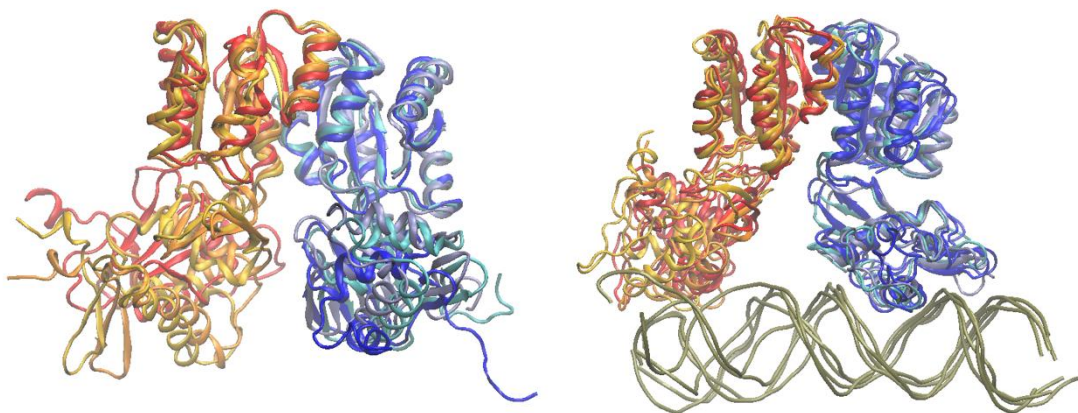

**Figure S2:** Molecular dynamics conformations clustering. On the left, the unbound HP1043, on the right, the HP1043-DNA bound complex. Chain A is depicted in red, chain B in blue, DNA in green.

Figure S3

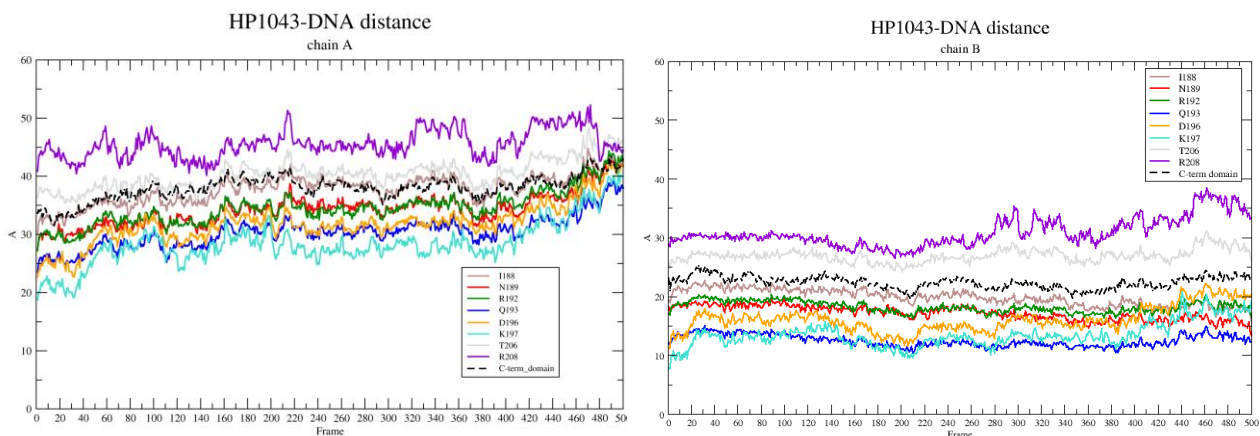

**Figure S3:** Calculated distance between selected residues at the HP1043-DNA interface. Distance between DBD residues and DNA centers of motion are plotted along the trajectory. The black dashed line shows the distance from each DBD center of motion and the DNA center of motion.

**Table S1** - List of oligonucleotides used in this study

| Oligo          | Sequence (5' to 3')                                             | *  |
|----------------|-----------------------------------------------------------------|----|
| p1227WT_F      | TTCTCTTATTTTCACCTTCATTTTAAAGCAAACCTTAAACTTGTAATTGTATCATTTTAAG   | P  |
| p1227WT_R      | CTTAAAATGATACAATTACAAGTTTAAAGTTTTGCTTAAAAAATGAAGTGAAAATAAGAGAA  | P  |
| p1227T1F_F     | TTCTCTTATTTTCACCTTCATTTAATAAGCAAACCTTAAACTTGTAATTGTATCATTTTAAG  | P  |
| p1227T1F_R     | CTTAAAATGATACAATTACAAGTTTAAAGTTTTGCTTAAATAAATGAAGTGAAAATAAGAGAA | P  |
| p1227T2F_F     | TTCTCTTATTTTCACCTTCATTTATAAGCAAACCTTAAACTTGTAATTGTATCATTTTAAG   | P  |
| p1227T2F_R     | CTTAAAATGATACAATTACAAGTTTAAAGTTTTGCTTAAAAAATGAAGTGAAAATAAGAGAA  | P  |
| p1227T3F_F     | TTCTCTTATTTTCACCTTCATTTTAAAGCAAACCTTAAACTTGTAATTGTATCATTTTAAG   | P  |
| p1227T3F_R     | CTTAAAATGATACAATTACAAGTTTAAAGTTTTGCTTAAAAAATGAAGTGAAAATAAGAGAA  | P  |
| p1227A1F_F     | TTCTCTTATTTTCACCTTCATTTTTAGCAAACCTTAAACTTGTAATTGTATCATTTTAAG    | P  |
| p1227A1F_R     | CTTAAAATGATACAATTACAAGTTTAAAGTTTTGCTTAAAAAATGAAGTGAAAATAAGAGAA  | P  |
| p1227A2F_F     | TTCTCTTATTTTCACCTTCATTTTATGCAAACCTTAAACTTGTAATTGTATCATTTTAAG    | P  |
| p1227A2F_R     | CTTAAAATGATACAATTACAAGTTTAAAGTTTTGCATAAAAAAATGAAGTGAAAATAAGAGAA | P  |
| p1227GF_F      | TTCTCTTATTTTCACCTTCATTTTAAACCAAACCTTAAACTTGTAATTGTATCATTTTAAG   | P  |
| p1227GF_R      | CTTAAAATGATACAATTACAAGTTTAAAGTTTTGGTTAAAAAATGAAGTGAAAATAAGAGAA  | P  |
| p1227ΔF_F      | TTCTCTTATTTTCACCTTCATTTGGATCCCAAACCTTAAACTTGTAATTGTATCATTTTAAG  | P  |
| p1227ΔF_R      | CTTAAAATGATACAATTACAAGTTTAAAGTTTTGGATCCCAAATGAAGTGAAAATAAGAGAA  | P  |
| p1227T1S_F     | TTCTCTTATTTTCACCTTCATTTTAAAGCAAAGTTAAACTTGTAATTGTATCATTTTAAG    | P  |
| p1227T1S_R     | CTTAAAATGATACAATTACAAGTTTAACTTTTGCTTAAAAAATGAAGTGAAAATAAGAGAA   | P  |
| p1227T2S_F     | TTCTCTTATTTTCACCTTCATTTTAAAGCAAACATAAACTTGTAATTGTATCATTTTAAG    | P  |
| p1227T2S_R     | CTTAAAATGATACAATTACAAGTTTATGTTTTGCTTAAAAAATGAAGTGAAAATAAGAGAA   | P  |
| p1227T3S_F     | TTCTCTTATTTTCACCTTCATTTTAAAGCAAACCTTAAACTTGTAATTGTATCATTTTAAG   | P  |
| p1227T3S_R     | CTTAAAATGATACAATTACAAGTTTATGTTTTGCTTAAAAAATGAAGTGAAAATAAGAGAA   | P  |
| p1227A1S_F     | TTCTCTTATTTTCACCTTCATTTTAAAGCAAACCTTAAACTTGTAATTGTATCATTTTAAG   | P  |
| p1227A1S_R     | CTTAAAATGATACAATTACAAGTTAAAGTTTTGCTTAAAAAATGAAGTGAAAATAAGAGAA   | P  |
| p1227A2S_F     | TTCTCTTATTTTCACCTTCATTTTAAAGCAAACCTTAACTTGTAATTGTATCATTTTAAG    | P  |
| p1227A2S_R     | CTTAAAATGATACAATTACAAGTATAAGTTTTGCTTAAAAAATGAAGTGAAAATAAGAGAA   | P  |
| p1227GS_F      | TTCTCTTATTTTCACCTTCATTTTAAAGCAAACCTTAACTTGTAATTGTATCATTTTAAG    | P  |
| p1227GS_R      | CTTAAAATGATACAATTACAAGATTAAGTTTTGCTTAAAAAATGAAGTGAAAATAAGAGAA   | P  |
| p1227ΔS_F      | TTCTCTTATTTTCACCTTCATTTTAAAGCAAAGGATCCCTTGTAATTGTATCATTTTAAG    | P  |
| p1227ΔS_R      | CTTAAAATGATACAATTACAAGGGATCCCTTTGCTTAAAAAATGAAGTGAAAATAAGAGAA   | P  |
| LuxRT_F        | TTGGCAGATGTGTGTACCTC                                            | RT |
| LuxRT_R        | TGATGACTCCCAAGGAAAAATAG                                         | RT |
| p1227EcoRV_F   | TTCTCTTATTTTCACCTTCATTT                                         | C  |
| p1227EcoRV_R   | ATATGAATTCCTTAAAATGATACAATTACAAG                                | C  |
| HP1043_I184A_F | GGCTGAAGTGGCTATCAATCAAATCCG                                     | M  |
| HP1043_E185A_F | GATTGCAGTGGCTATCAATCAAATCCG                                     | M  |
| HP1043_I188A_F | GATTGAAGTGGCTGCCAATCAAATCCGCC                                   | M  |
| HP1043_N189A_F | GATTGAAGTGGCTATCGCTCAAATCCGCC                                   | M  |
| HP1043_N189A_R | ACATTAGGGGTAACCATTTCAGG                                         | M  |
| HP1043_R192A_F | CGCCAAAAAATGGATAAACCCCTTGG                                      | M  |
| HP1043_R192A_R | ATTTGATTGATAGCCACTTCAATC                                        | M  |
| HP1043_Q193A_F | CCGCGCAAAAAATGGATAAACCCCTTGGGG                                  | M  |
| HP1043_D196A_F | GCTAAACCCTTGGGGATTTCACG                                         | M  |
| HP1043_D196A_R | CATTTTTGGCGGATTTGATTGATAG                                       | M  |
| HP1043_K197A_F | GATGCACCCTTGGGGATTTCAC                                          | M  |
| HP1043_Y206A_F | GGTTGAAGCTGTAAGGCGCAGAGG                                        | M  |
| HP1043_Y206A_R | GTGAAATCCCAAGGGTTTATC                                           | M  |
| HP1043_R208A_F | GGTTGAAACCGTAGCGCGCAGAGGCTATC                                   | M  |
| HP1043_EAA_F   | GAAGCTGCAGGGAAGCCTTTTGAAGTGCTTAC                                | M  |
| HP1043_AAE_F   | GCTGCTGAAGGGAAGCCTTTTGAAGTGCTTAC                                | M  |
| HP1043_EVK_R   | AACTTCACGCCCTTGTAAATAATC                                        | M  |
| HP1043_Q190A_F | AATCCGCCAAAAAATGGATAAAC                                         | M  |
| HP1043_Q190A_R | GCATTGATAGCCACTTCAATCAC                                         | M  |
| HP1043_K194A_F | GCAATGGATAAACCCCTTGGGG                                          | M  |

|                   |                                      |   |
|-------------------|--------------------------------------|---|
| HP1043_K194A_R    | TTGGCGGATTGATTGATAGC                 | M |
| HP1043_R209A_F    | <u>GCC</u> CAGAGGCTATCGTTTTTGC       | M |
| HP1043_R209A_R    | CCTTACGGTTTCAACCGTG                  | M |
| HP1043_R210A_F    | <u>CGCGC</u> AGGCTATCGTTTTTGCTAC     | M |
| HP1043_CTD_NheI_F | ATATGCTAGCAATGTGATTGAAATTGGGGATTTGAC | C |
| HP1043_BamHI_R    | ATATGGATCCTTACTCTTCACACGCCGGTTTTG    | C |

\* P = oligo used for DNA probes used in *in vitro* binding assays; M = oligo used for protein mutagenesis; C = oligo used for cloning; RT = oligo used in RealTime PCR. In P and M oligos, mutations in respect to the wild type are underlined.

**Table S2** - List of strains and plasmids used in this study

| Strain                          | Description                                                                                                                                                                                                                                                                                                                                                                | Reference                     |
|---------------------------------|----------------------------------------------------------------------------------------------------------------------------------------------------------------------------------------------------------------------------------------------------------------------------------------------------------------------------------------------------------------------------|-------------------------------|
| <i>E. coli</i> DH5 $\alpha$     | <i>supE44</i> $\Delta$ <i>lacU169</i> ( $\phi$ 80 <i>lacZ</i> $\Delta$ M15) <i>hsdR17</i> <i>recA1</i> <i>endA1</i> <i>gyrA96</i> <i>thi-1</i> <i>relA1</i>                                                                                                                                                                                                                | [36]                          |
| Plasmid                         | Description                                                                                                                                                                                                                                                                                                                                                                |                               |
| pBlueScript KSII (+)            | Cloning vector; Amp <sup>R</sup>                                                                                                                                                                                                                                                                                                                                           | Agilent, Santa Clara, CA, USA |
| PBSK- <i>p1227</i> _WT          | pBlueScript KSII (+) derivative, containing a 61 bp probe corresponding to the region from 1.290.664 to 1.290.725 of the <i>H. pylori</i> G27 genome obtained by annealing of oligos p1227WT_F/ p1227WT_R, corresponding to the promoter of the <i>HPG27_RS06145</i> gene ( <i>hp1227</i> according to <i>H. pylori</i> strain 26695 annotation)                           | This work                     |
| PBSK- <i>p1227</i> _T1F         | pBlueScript KSII (+) derivative, containing a 61 bp probe corresponding to the region from 1.290.664 to 1.290.725 of the <i>H. pylori</i> G27 genome obtained by annealing of oligos p1227T1F_F/ p1227T1F_R, corresponding to the mutated promoter of the <i>HPG27_RS06145</i> gene ( <i>hp1227</i> according to <i>H. pylori</i> strain 26695 annotation)                 | This work                     |
| PBSK- <i>p1227</i> _T2F         | pBlueScript KSII (+) derivative, containing a 61 bp probe corresponding to the region from 1.290.664 to 1.290.725 of the <i>H. pylori</i> G27 genome obtained by annealing of oligos p1227T2F_F/ p1227T2F_R, corresponding to the mutated promoter of the <i>HPG27_RS06145</i> gene ( <i>hp1227</i> according to <i>H. pylori</i> strain 26695 annotation)                 | This work                     |
| PBSK- <i>p1227</i> _T3F         | pBlueScript KSII (+) derivative, containing a 61 bp probe corresponding to the region from 1.290.664 to 1.290.725 of the <i>H. pylori</i> G27 genome obtained by annealing of oligos p1227T3F_F/ p1227T3F_R, corresponding to the mutated promoter of the <i>HPG27_RS06145</i> gene ( <i>hp1227</i> according to <i>H. pylori</i> strain 26695 annotation)                 | This work                     |
| PBSK- <i>p1227</i> _A1F         | pBlueScript KSII (+) derivative, containing a 61 bp probe corresponding to the region from 1.290.664 to 1.290.725 of the <i>H. pylori</i> G27 genome obtained by annealing of oligos p1227A1F_F/ p1227 A1F_R, corresponding to the mutated promoter of the <i>HPG27_RS06145</i> gene ( <i>hp1227</i> according to <i>H. pylori</i> strain 26695 annotation)                | This work                     |
| PBSK- <i>p1227</i> _A2F         | pBlueScript KSII (+) derivative, containing a 61 bp probe corresponding to the region from 1.290.664 to 1.290.725 of the <i>H. pylori</i> G27 genome obtained by annealing of oligos p1227A2F_F/ p1227A2F_R, corresponding to the mutated promoter of the <i>HPG27_RS06145</i> gene ( <i>hp1227</i> according to <i>H. pylori</i> strain 26695 annotation)                 | This work                     |
| PBSK- <i>p1227</i> _GF          | pBlueScript KSII (+) derivative, containing a 61 bp probe corresponding to the region from 1.290.664 to 1.290.725 of the <i>H. pylori</i> G27 genome obtained by annealing of oligos p1227GF_F/ p1227GF_R, corresponding to the mutated promoter of the <i>HPG27_RS06145</i> gene ( <i>hp1227</i> according to <i>H. pylori</i> strain 26695 annotation)                   | This work                     |
| PBSK- <i>p1227</i> _ $\Delta$ F | pBlueScript KSII (+) derivative, containing a 61 bp probe corresponding to the region from 1.290.664 to 1.290.725 of the <i>H. pylori</i> G27 genome obtained by annealing of oligos p1227 $\Delta$ F_F/ p1227 $\Delta$ F_R, corresponding to the mutated promoter of the <i>HPG27_RS06145</i> gene ( <i>hp1227</i> according to <i>H. pylori</i> strain 26695 annotation) | This work                     |
| PBSK- <i>p1227</i> _T1S         | pBlueScript KSII (+) derivative, containing a 61 bp probe corresponding to the region from 1.290.664 to 1.290.725 of the <i>H. pylori</i> G27 genome obtained by annealing of oligos p1227T1S_F/ p1227T1S_R, corresponding to the mutated promoter of the <i>HPG27_RS06145</i> gene ( <i>hp1227</i> according to <i>H. pylori</i> strain 26695 annotation)                 | This work                     |
| PBSK- <i>p1227</i> _T2S         | pBlueScript KSII (+) derivative, containing a 61 bp probe corresponding to the region from 1.290.664 to 1.290.725 of the <i>H. pylori</i> G27 genome obtained by annealing of oligos p1227T2S_F/ p1227T2S_R, corresponding to the mutated promoter of the <i>HPG27_RS06145</i> gene ( <i>hp1227</i> according to <i>H. pylori</i> strain 26695 annotation)                 | This work                     |
| PBSK- <i>p1227</i> _T3S         | pBlueScript KSII (+) derivative, containing a 61 bp probe corresponding to the region from 1.290.664 to 1.290.725 of the <i>H. pylori</i> G27 genome obtained by annealing of oligos p1227T3S_F/ p1227T3S_R, corresponding to the mutated promoter of the <i>HPG27_RS06145</i> gene ( <i>hp1227</i> according to <i>H. pylori</i> strain 26695 annotation)                 | This work                     |
| PBSK- <i>p1227</i> _A1S         | pBlueScript KSII (+) derivative, containing a 61 bp probe corresponding to the region from 1.290.664 to 1.290.725 of the <i>H. pylori</i> G27 genome obtained by annealing of oligos p1227A1S_F/ p1227A1S_R, corresponding to the mutated promoter of the <i>HPG27_RS06145</i> gene ( <i>hp1227</i> according to <i>H. pylori</i> strain 26695 annotation)                 | This work                     |

|                        |                                                                                                                                                                                                                                                                                                                                                            |                           |
|------------------------|------------------------------------------------------------------------------------------------------------------------------------------------------------------------------------------------------------------------------------------------------------------------------------------------------------------------------------------------------------|---------------------------|
| PBSK- <i>p1227_A2S</i> | pBlueScript KSII (+) derivative, containing a 61 bp probe corresponding to the region from 1.290.664 to 1.290.725 of the <i>H. pylori</i> G27 genome obtained by annealing of oligos p1227A2S_F/ p1227A2S_R, corresponding to the mutated promoter of the <i>HPG27_RS06145</i> gene ( <i>hp1227</i> according to <i>H. pylori</i> strain 26695 annotation) | This work                 |
| PBSK- <i>p1227_GS</i>  | pBlueScript KSII (+) derivative, containing a 61 bp probe corresponding to the region from 1.290.664 to 1.290.725 of the <i>H. pylori</i> G27 genome obtained by annealing of oligos p1227GS_F/ p1227GS_R, corresponding to the mutated promoter of the <i>HPG27_RS06145</i> gene ( <i>hp1227</i> according to <i>H. pylori</i> strain 26695 annotation)   | This work                 |
| PBSK- <i>p1227_ΔS</i>  | pBlueScript KSII (+) derivative, containing a 61 bp probe corresponding to the region from 1.290.664 to 1.290.725 of the <i>H. pylori</i> G27 genome obtained by annealing of oligos p1227ΔS_F/ p1227ΔS_R, corresponding to the mutated promoter of the <i>HPG27_RS06145</i> gene ( <i>hp1227</i> according to <i>H. pylori</i> strain 26695 annotation)   | This work                 |
| pGEMt-Easy             | Cloning vector; Amp <sup>R</sup>                                                                                                                                                                                                                                                                                                                           | Promega, Madison, WI, USA |
| pGEMt- <i>P1227</i> WT | pGEMt-Easy derivative, containing a 61 bp probe corresponding to the region from 1.290.664 to 1.290.725 of <i>H. pylori</i> G27 genome. The region corresponds to the promoter of <i>HPG27_RS06145</i> gene ( <i>hp1227</i> according to <i>H. pylori</i> 26695 strain annotation)                                                                         | This work                 |
| pSB1075                | Plasmid vector containing the 5.8 kb <i>Photothabdus luminescens luxCDABE</i> operon cassette; Amp <sup>R</sup>                                                                                                                                                                                                                                            | [39]                      |
| pLux                   | PSB1075 derivative in which promoter <i>lasRI'</i> was deleted to generate a promoterless <i>lux</i> operon                                                                                                                                                                                                                                                | This work                 |
| pLux- <i>p1227_WT</i>  | pLux derivative containing a 61 bp DNA fragment corresponding to the <i>hp1227</i> promoter amplified by PCR with oligos p1227EcoRV_F/p1227EcoRV_R from PBSK- <i>p1227_WT</i> cloned upstream the <i>luxCDABE</i> operon                                                                                                                                   | This work                 |
| pLux- <i>p1227_T1F</i> | pLux derivative containing a 61 bp DNA fragment corresponding to the mutated <i>hp1227</i> promoter amplified by PCR with oligos p1227EcoRV_F/p1227EcoRV_R from PBSK- <i>p1227_T1F</i> cloned upstream the <i>luxCDABE</i> operon                                                                                                                          | This work                 |
| pLux- <i>p1227_T2F</i> | pLux derivative containing a 61 bp DNA fragment corresponding to the mutated <i>hp1227</i> promoter amplified by PCR with oligos p1227EcoRV_F/p1227EcoRV_R from PBSK- <i>p1227_T2F</i> cloned upstream the <i>luxCDABE</i> operon                                                                                                                          | This work                 |
| pLux- <i>p1227_T3F</i> | pLux derivative containing a 61 bp DNA fragment corresponding to the mutated <i>hp1227</i> promoter amplified by PCR with oligos p1227EcoRV_F/p1227EcoRV_R from PBSK- <i>p1227_T3F</i> cloned upstream the <i>luxCDABE</i> operon                                                                                                                          | This work                 |
| pLux- <i>p1227_A1F</i> | pLux derivative containing a 61 bp DNA fragment corresponding to the mutated <i>hp1227</i> promoter amplified by PCR with oligos p1227EcoRV_F/p1227EcoRV_R from PBSK- <i>p1227_A1F</i> cloned upstream the <i>luxCDABE</i> operon                                                                                                                          | This work                 |
| pLux- <i>p1227_A2F</i> | pLux derivative containing a 61 bp DNA fragment corresponding to the mutated <i>hp1227</i> promoter amplified by PCR with oligos p1227EcoRV_F/p1227EcoRV_R from PBSK- <i>p1227_A2F</i> cloned upstream the <i>luxCDABE</i> operon                                                                                                                          | This work                 |
| pLux- <i>p1227_GF</i>  | pLux derivative containing a 61 bp DNA fragment corresponding to the mutated <i>hp1227</i> promoter amplified by PCR with oligos p1227EcoRV_F/p1227EcoRV_R from PBSK- <i>p1227_GF</i> cloned upstream the <i>luxCDABE</i> operon                                                                                                                           | This work                 |
| pLux- <i>p1227_ΔF</i>  | pLux derivative containing a 61 bp DNA fragment corresponding to the mutated <i>hp1227</i> promoter amplified by PCR with oligos p1227EcoRV_F/p1227EcoRV_R from PBSK- <i>p1227_ΔF</i> cloned upstream the <i>luxCDABE</i> operon                                                                                                                           | This work                 |
| pLux- <i>p1227_T1S</i> | pLux derivative containing a 61 bp DNA fragment corresponding to the mutated <i>hp1227</i> promoter amplified by PCR with oligos p1227EcoRV_F/p1227EcoRV_R from PBSK- <i>p1227_T1S</i> cloned upstream the <i>luxCDABE</i> operon                                                                                                                          | This work                 |
| pLux- <i>p1227_T2S</i> | pLux derivative containing a 61 bp DNA fragment corresponding to the mutated <i>hp1227</i> promoter amplified by PCR with oligos p1227EcoRV_F/p1227EcoRV_R from PBSK- <i>p1227_T2S</i> cloned upstream the <i>luxCDABE</i> operon                                                                                                                          | This work                 |
| pLux- <i>p1227_T3S</i> | pLux derivative containing a 61 bp DNA fragment corresponding to the mutated <i>hp1227</i> promoter amplified by PCR with oligos p1227EcoRV_F/p1227EcoRV_R from PBSK- <i>p1227_T3S</i> cloned upstream the <i>luxCDABE</i> operon                                                                                                                          | This work                 |
| pLux- <i>p1227_A1S</i> | pLux derivative containing a 61 bp DNA fragment corresponding to the mutated <i>hp1227</i> promoter amplified by PCR with oligos p1227EcoRV_F/p1227EcoRV_R from PBSK- <i>p1227_A1S</i> cloned upstream the <i>luxCDABE</i> operon                                                                                                                          | This work                 |
| pLux- <i>p1227_A2S</i> | pLux derivative containing a 61 bp DNA fragment corresponding to the mutated <i>hp1227</i> promoter amplified by PCR with oligos p1227EcoRV_F/p1227EcoRV_R from PBSK- <i>p1227_A2S</i> cloned upstream the <i>luxCDABE</i> operon                                                                                                                          | This work                 |

|                       |                                                                                                                                                                                                                                                          |                                           |
|-----------------------|----------------------------------------------------------------------------------------------------------------------------------------------------------------------------------------------------------------------------------------------------------|-------------------------------------------|
| pLux- <i>p1227_GS</i> | pLux derivative containing a 61 bp DNA fragment corresponding to the mutated <i>hp1227</i> promoter amplified by PCR with oligos p1227EcoRV_F/p1227EcoRV_R from PBSK- <i>p1227_GS</i> cloned upstream the <i>luxCDABE</i> operon                         | This work                                 |
| pLux- <i>p1227_ΔS</i> | pLux derivative containing a 61 bp DNA fragment corresponding to the mutated <i>hp1227</i> promoter amplified by PCR with oligos p1227EcoRV_F/p1227EcoRV_R from PBSK- <i>p1227_ΔS</i> cloned upstream the <i>luxCDABE</i> operon                         | This work                                 |
| pTrcHisA              | Expression vector for N-terminal 6xHis-tag cloning; Amp <sup>R</sup>                                                                                                                                                                                     | ThermoFisher Scientific, Waltham, MA, USA |
| pTrc::1043            | Derivative of pTrcHisA expressing the HP1043 response regulator; Amp <sup>R</sup>                                                                                                                                                                        | [10]                                      |
| pTrc::1043_CTD        | pTrcHisA derivative containing the C-terminal domain (CTD) of HP1043 (residues 119-223) amplified by PCR with oligos HP1043_CTD_NheI_F and HP1043_BamHI_R cloned in frame with the His-tag after digestion with NheI and BamHI enzymes; Amp <sup>R</sup> | This work                                 |

**Table S3** –  $\Delta\Delta G$  binding energy (kcal/mol) obtained from alanine scanning

|             | Chain A | Chain B |
|-------------|---------|---------|
| <b>I188</b> | -0.14   | -0.66   |
| <b>N189</b> | -0.58   | -1.63   |
| <b>Q190</b> | -0.00   | -1.36   |
| <b>R192</b> | -9.40   | -19.22  |
| <b>Q193</b> | -1.59   | -12.82  |
| <b>K194</b> | -1.96   | -6.68   |
| <b>D196</b> | 2.55    | 1.80    |
| <b>K197</b> | -0.89   | -2.07   |
| <b>T206</b> | -0.34   | -2.92   |
| <b>R208</b> | -3.04   | -10.34  |
| <b>R209</b> | -0.15   | -3.81   |
